# Supplementary material for: Longitudinal Plant Health Monitoring via High-Resolution Mass Spectrometry Screening Workflows: Application to a Fertilizer Mediated Tomato Growth Experiment
Source: MDPI journal article supplement (doi:10.3390/molecules28196771), 2023-09-22
Supplement: s1 [file s1]

Supplementary Material

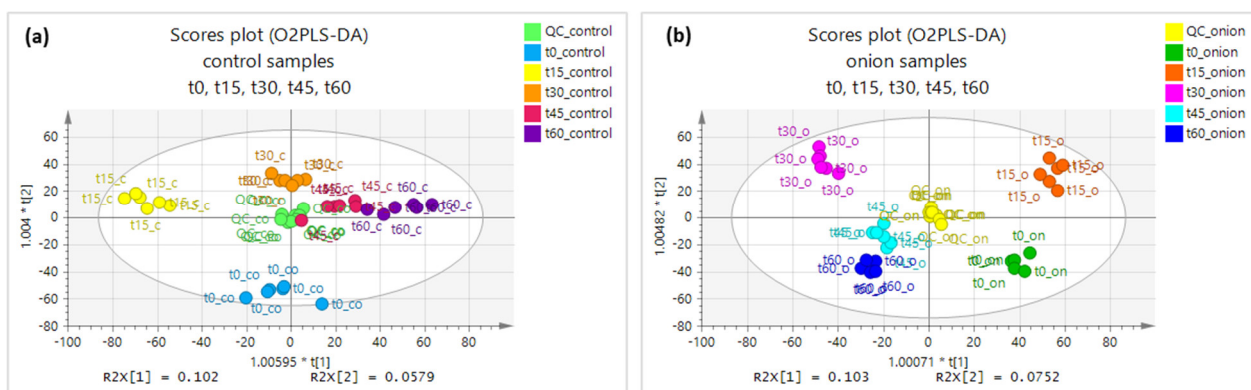

**Figure S1:** Score plot O2PLS-DA of (a) control samples and (b) onion samples at five time points (t0, t15, t30, t45, t60) with their corresponding QC samples using UV scaling in positive ionization mode.

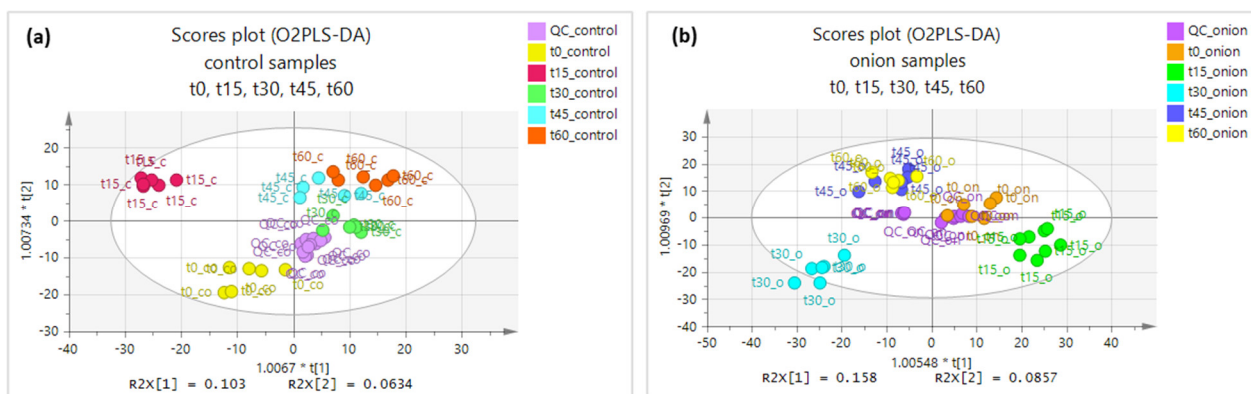

**Figure S2:** Score plot O2PLS-DA of (a) control samples and (b) onion samples at five timepoints (t0, t15, t30, t45, t60) with their corresponding QC samples using UV scaling in negative ionization mode.

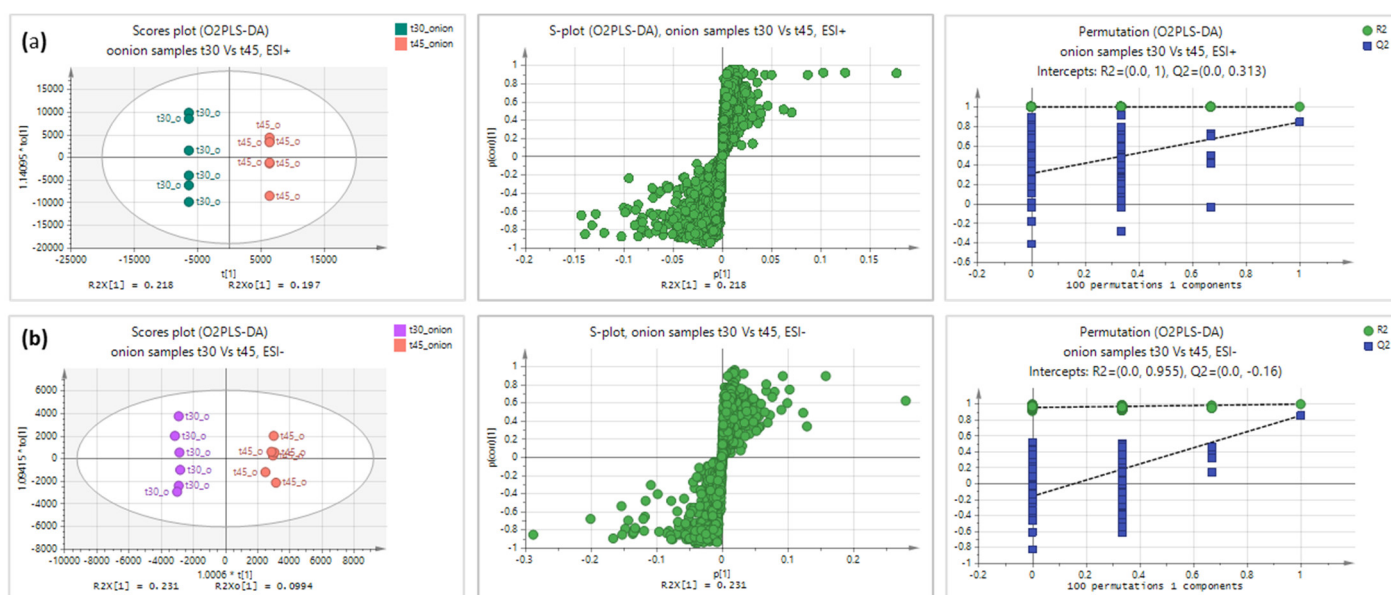

**Figure S3:** Score plot O2PLS-DA discrimination using pareto scaling, S-Plot, and permutation testing for onion samples at t30 vs. t45 in (a) positive ionization mode and (b) negative ionization mode.

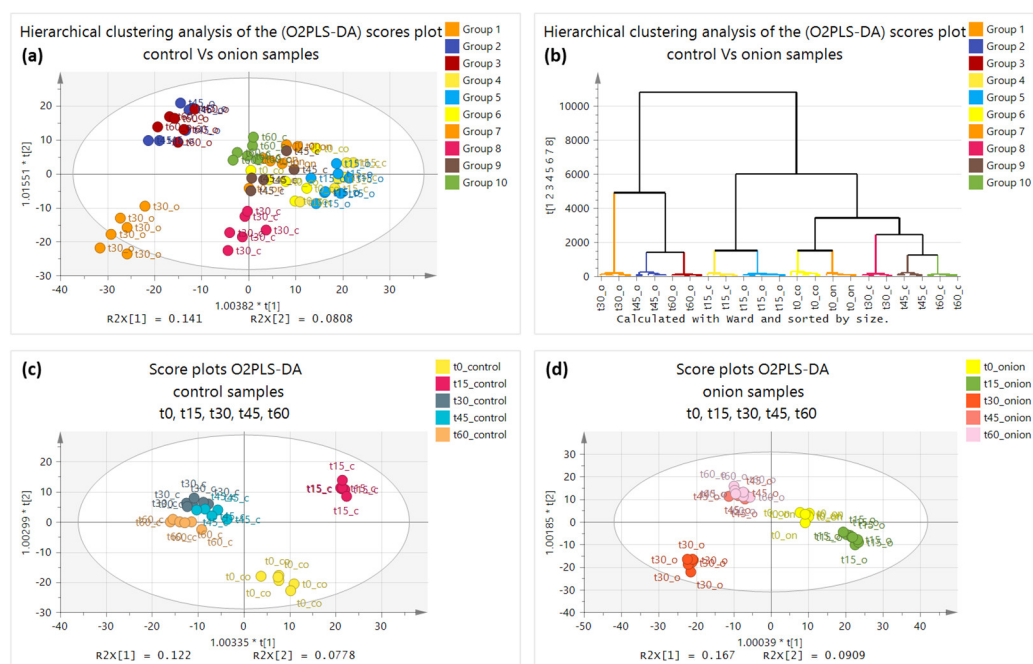

**Figure S4:** Plots of O2PLS-DA and hierarchical clustering analysis: (a) score plots of control and onion samples (b) hierarchical clustering analysis O2PLS-DA of control and onion samples; score plot O2PLS-DA discrimination between (c) control samples and (d) onion samples at five timepoints (t0, t15, t30, t45, t60) using UV scaling in negative ionization mode.

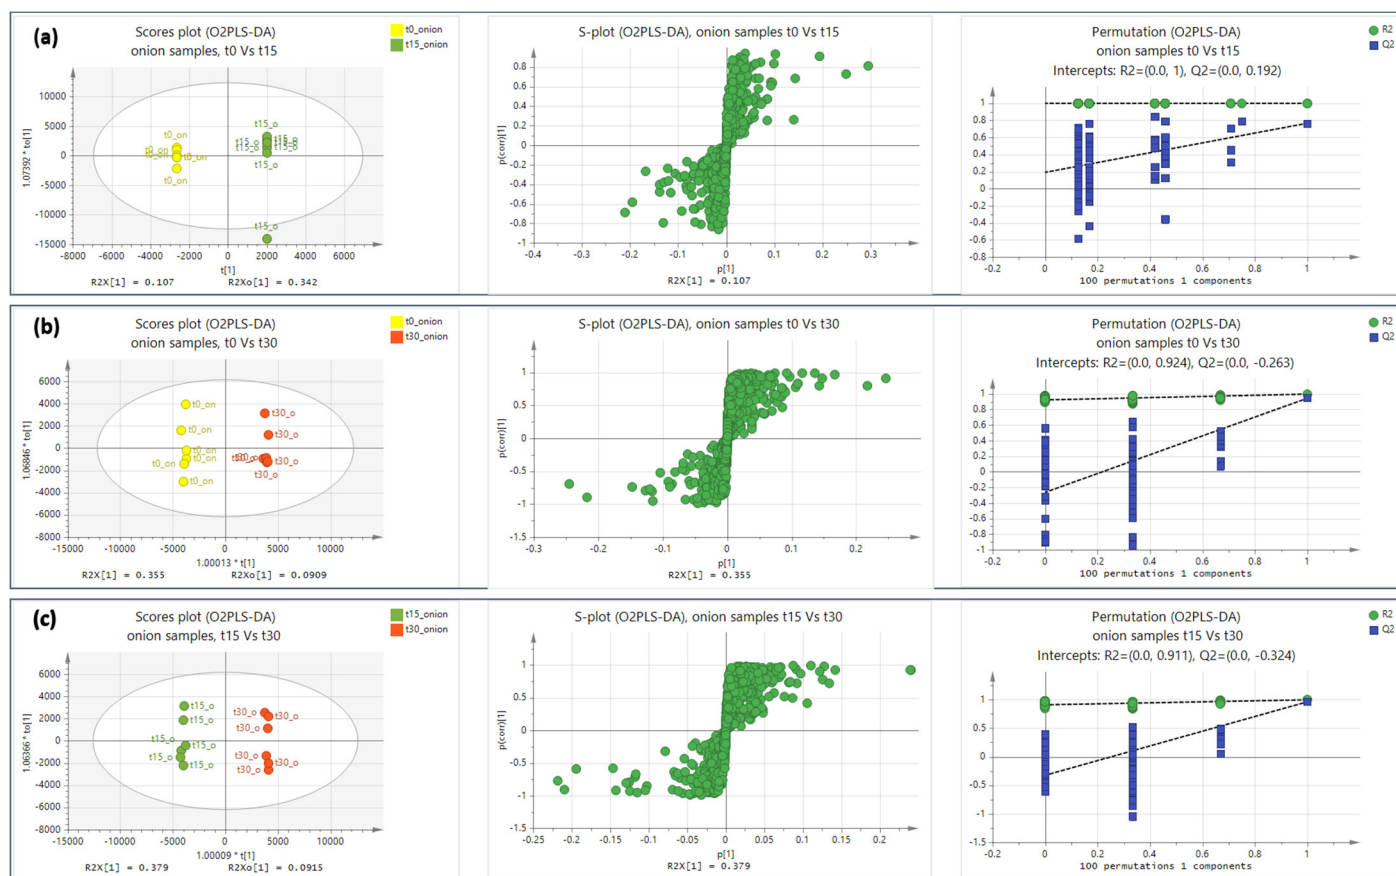

**Figure S5:** Score plot O2PLS-DA discrimination using pareto scaling, S-Plot, and permutation testing for onion samples at (a) t0 vs. t15, (b) t0 vs. t30, and (c) t15 vs. t30 in negative ionization mode.

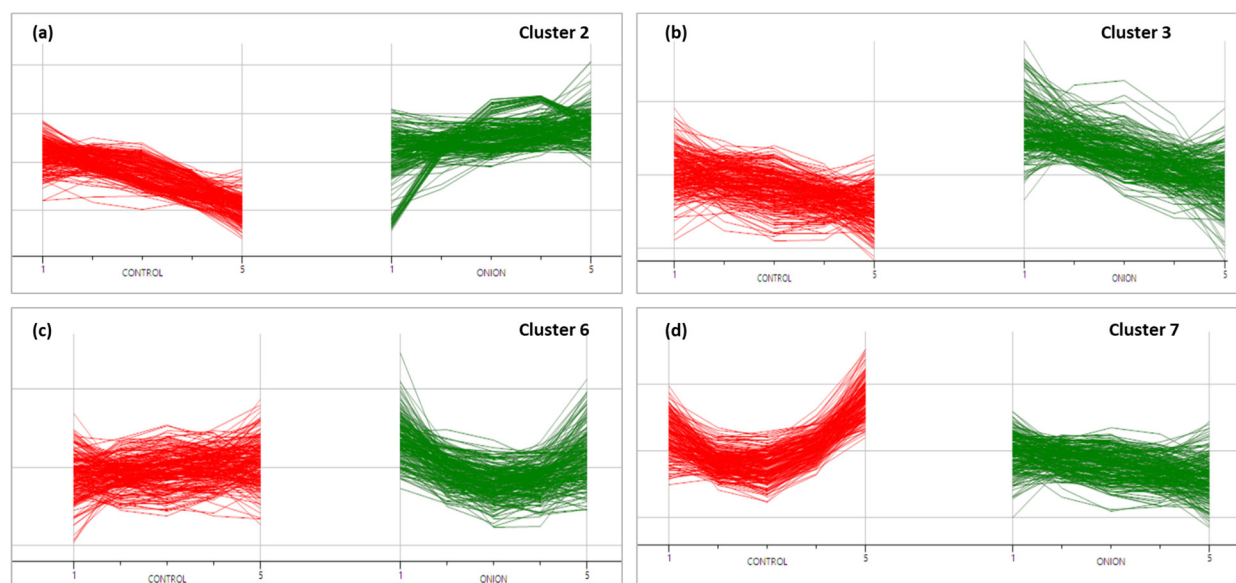

**Figure S6:** Examples of compound clustering between control (in red) and onion samples (in green) in positive ionization mode using MetaboClust: (a) Cluster 2, (b) Cluster 3, (c) Cluster 6, and (d) Cluster 7.

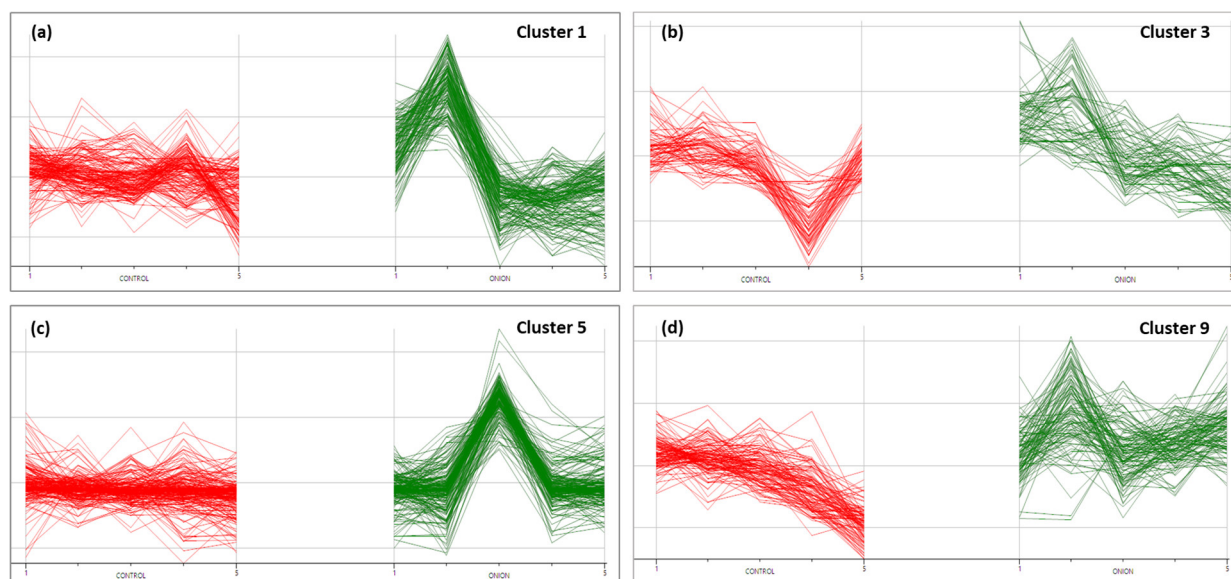

**Figure S7:** Examples of compound clustering between control (in red) and onion samples (in green) using MetaboClust: (a) Cluster 1, (b) Cluster 3, (c) Cluster 5, and (d) Cluster 9 in negative ionization mode.

**Table S1.** Performance characteristics of each classification model in **positive** ionization mode

| Investigated samples                        | R <sup>2</sup> (Y) | Q <sup>2</sup> | p-values               | Permutation values |                | Fisher's probabilities |
|---------------------------------------------|--------------------|----------------|------------------------|--------------------|----------------|------------------------|
|                                             |                    |                |                        | R <sup>2</sup>     | Q <sup>2</sup> |                        |
| Controls and Onions: t0, t15, t30, t45, t60 | 0.532              | 0.391          | 1.97 ×10 <sup>-5</sup> | 0.349              | -0.207         | 0                      |
| Controls: t0, t15, t30, t45, t60            | 0.973              | 0.572          | 1.46 ×10 <sup>-4</sup> | 0.909              | -0.179         | 8.8×10 <sup>-17</sup>  |
| Onions: t0, t15, t30, t45, t60              | 0.985              | 0.671          | 1.28 ×10 <sup>-6</sup> | 0.925              | -0.231         | 8.8×10 <sup>-17</sup>  |
| t0 onion, t15 onion                         | 1                  | 0.897          | 1.54 ×10 <sup>-1</sup> | 1                  | 0.37           | 0.0022                 |
| t0 onion, t30 onion                         | 0.997              | 0.948          | 5.52 ×10 <sup>-4</sup> | 0.909              | -0.285         | 0.0022                 |
| t15 onion, t30 onion                        | 0.999              | 0.938          | 1.48 ×10 <sup>-3</sup> | 0.991              | -0.135         | 0.0011                 |

**Table S2.** Performance characteristics of each classification model in **negative** ionization mode

| Investigated samples                        | R <sup>2</sup> (Y) | Q <sup>2</sup> | p-values               | Permutation values |                | Fisher's probabilities |
|---------------------------------------------|--------------------|----------------|------------------------|--------------------|----------------|------------------------|
|                                             |                    |                |                        | R <sup>2</sup>     | Q <sup>2</sup> |                        |
| Controls and Onions: t0, t15, t30, t45, t60 | 0.791              | 0.458          | 2.27 ×10 <sup>-3</sup> | 0.514              | -0.319         | 0                      |
| Controls: t0, t15, t30, t45, t60            | 0.971              | 0.655          | 5.27 ×10 <sup>-4</sup> | 0.877              | -0.239         | 6.1 ×10 <sup>-16</sup> |
| Onions: t0, t15, t30, t45, t60              | 0.973              | 0.755          | 4.70×10 <sup>-10</sup> | 0.889              | -0.265         | 9.9 ×10 <sup>-19</sup> |
| t0 onion, t15 onion                         | 1                  | 0.767          | 3.79 ×10 <sup>-1</sup> | 1                  | 0.192          | 0.00033                |
| t0 onion, t30 onion                         | 0.998              | 0.946          | 1.60 ×10 <sup>-4</sup> | 0.924              | -0.263         | 0.0011                 |
| t15 onion, t30 onion                        | 0.999              | 0.964          | 3.82×10 <sup>-5</sup>  | 0.911              | -0.324         | 0.0023                 |
